# Supplementary material for: FTIR combined with chemometric tools (fingerprinting spectroscopy) in comparison to HPLC: which strategy offers more opportunities as a green analytical chemistry technique for pharmaceutical analysis
Source: Royal Society of Chemistry journal article supplement (doi:10.1039/d0ay01749c), 2020-01-01
Supplement: d0ay01749c1.pdf [file d0ay01749c1.pdf]

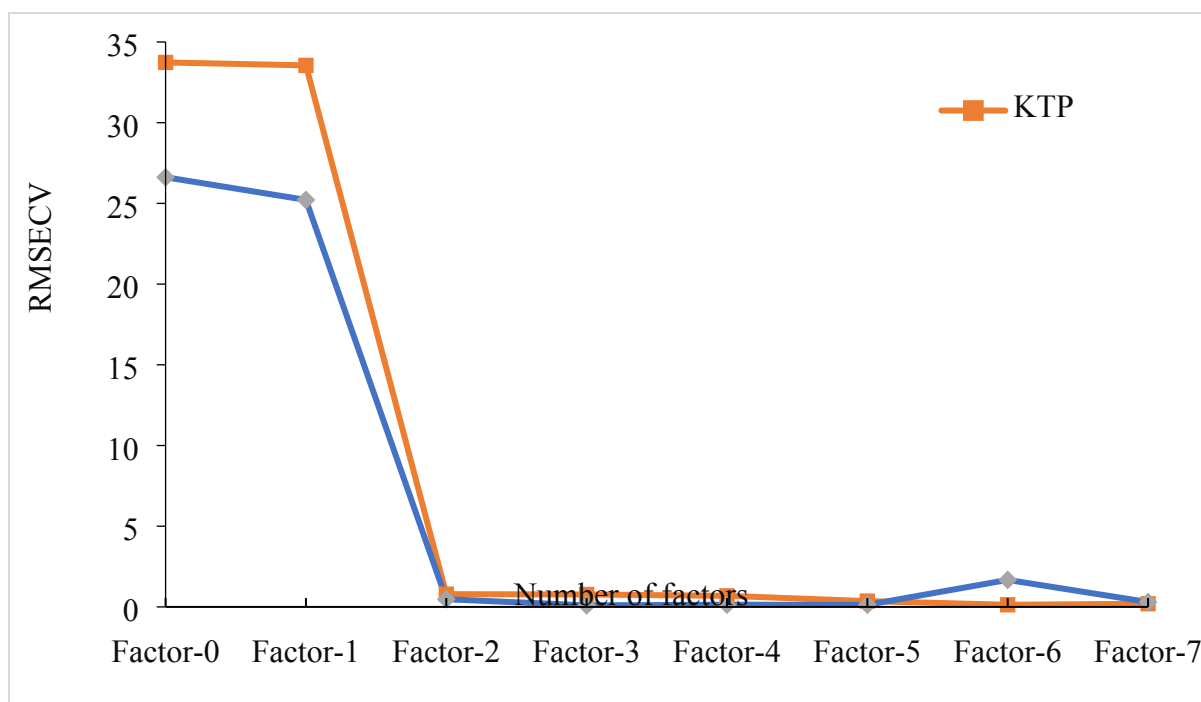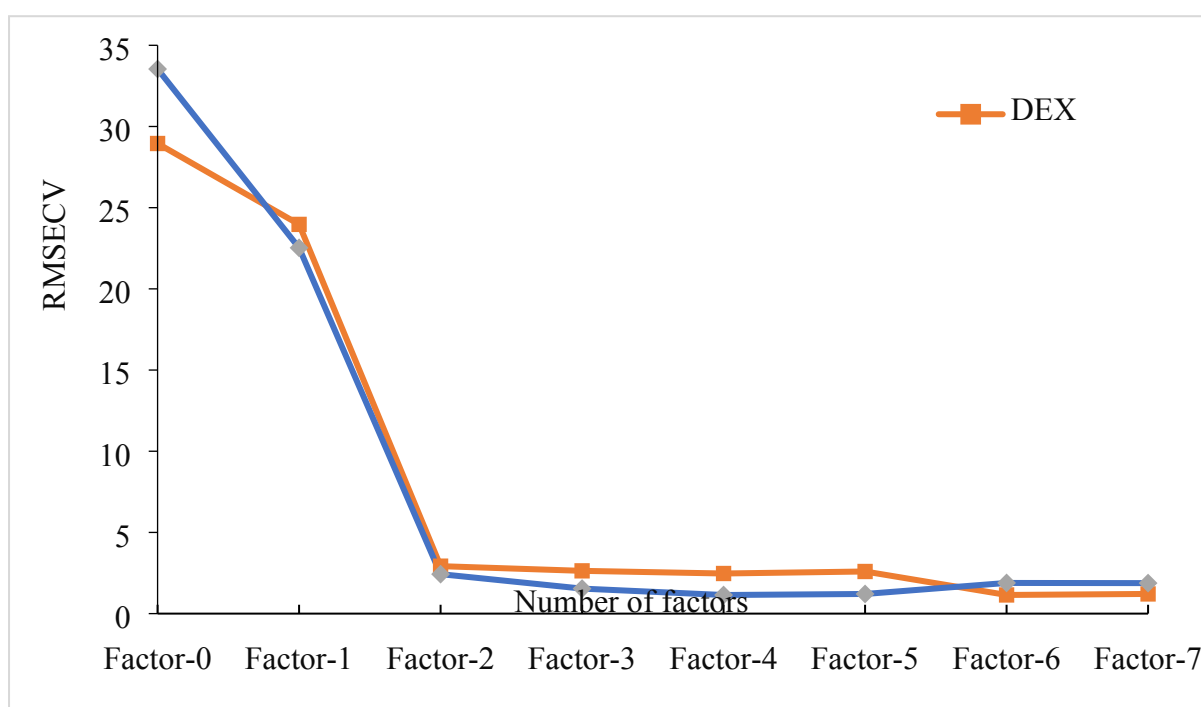

**Figure (1S):** Plots of RMSECV against the number of factors for calibration set of the binary mixtures using the developed PLSR models for the raw spectral data.

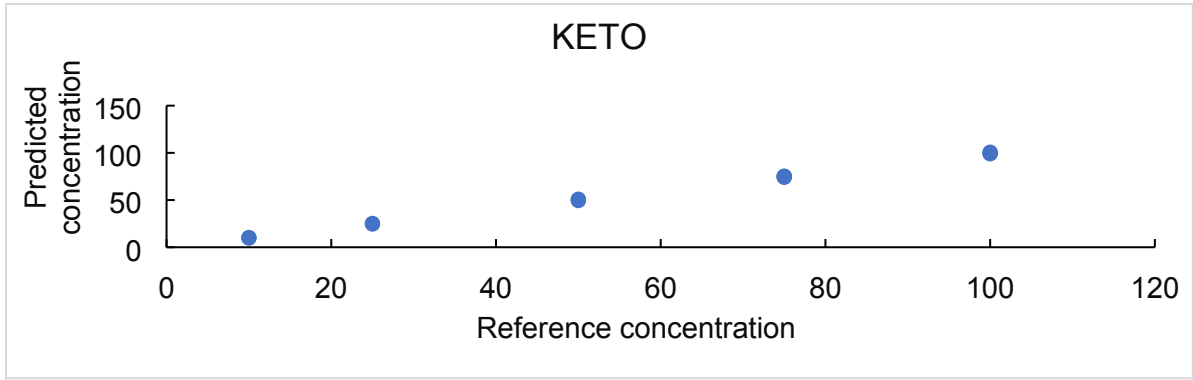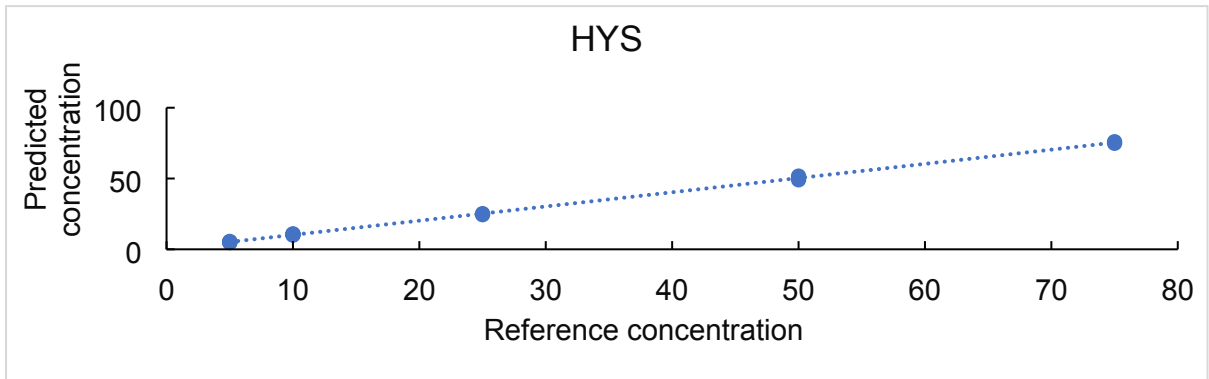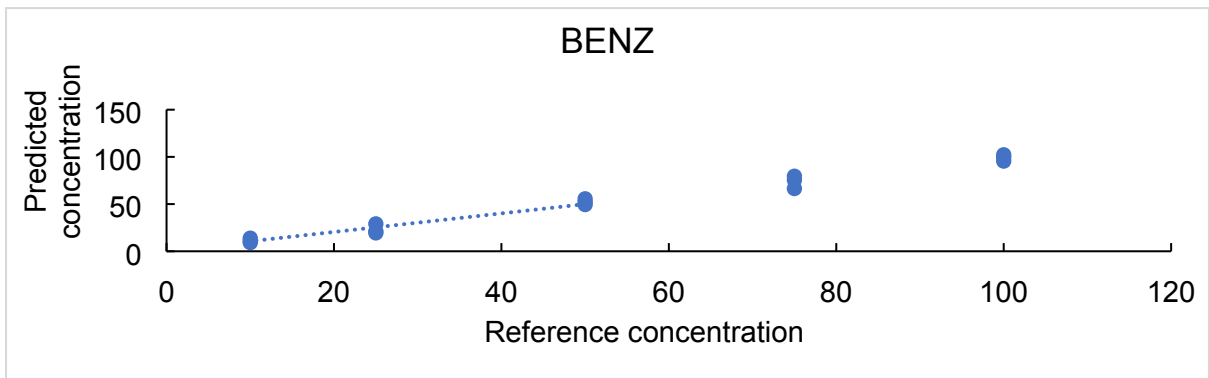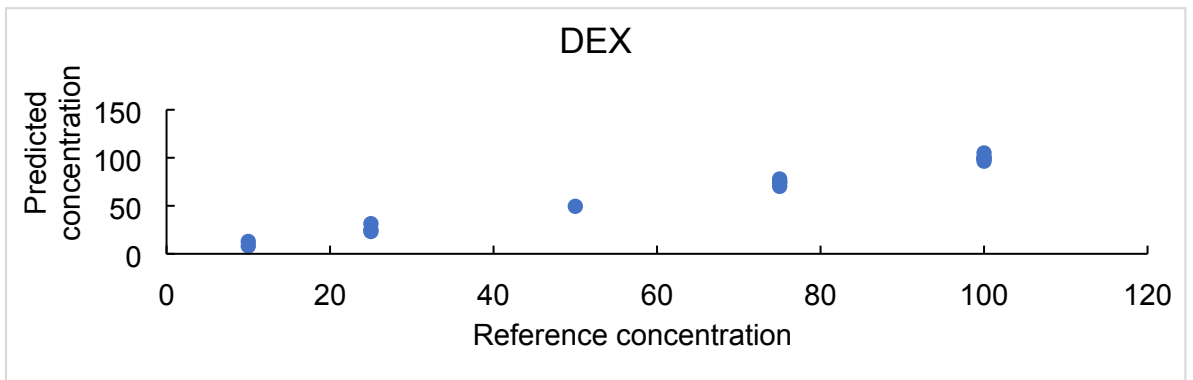

**Figure (2S):** The analytes reference concentrations against the predicted concentrations

**Table 1S:** The recovery percent obtained after applying the PLSR model to the test set in the presence of the expected excipients.

| <i>Mixture no #</i> | <i>Analytes (R%)</i> |            | <i>Mixture no #</i> | <i>Analytes (R%)</i> |            |
|---------------------|----------------------|------------|---------------------|----------------------|------------|
|                     | <i>HYS</i>           | <i>KTP</i> |                     | <i>BENZ</i>          | <i>DEX</i> |
| <b>1</b>            | 97.98                | 98.87      | <b>4</b>            | 102.12               | 97.82      |
| <b>2</b>            | 97.88                | 101.58     | <b>6</b>            | 97.54                | 99.51      |
| <b>9</b>            | 98.13                | 99.93      | <b>10</b>           | 98.80                | 101.87     |
| <b>16</b>           | 98.43                | 87.11      | <b>12</b>           | 99.67                | 99.86      |
| <b>17</b>           | 99.76                | 99.41      | <b>15</b>           | 97.09                | 99.03      |
| <b>19</b>           | 98.98                | 98.59      | <b>17</b>           | 98.88                | 98.77      |
| <b>22</b>           | 97.98                | 97.79      | <b>18</b>           | 101.87               | 97.66      |
| <b>23</b>           | 98.55                | 102.10     | <b>21</b>           | 101.65               | 98.34      |
| <b>24</b>           | 98.56                | 97.99      | <b>24</b>           | 98.82                | 100.82     |
| <b>25</b>           | 99.76                | 99.69      | <b>25</b>           | 97.71                | 101.92     |

# The concentration levels provided in (Table 1).

**Table 2S:** System suitability parameters for the determination of HYS and KTP by the HPLC method.

| Parameters                                            | Obtained value |         | Reference value                                        |
|-------------------------------------------------------|----------------|---------|--------------------------------------------------------|
|                                                       | HYS            | KTP     |                                                        |
| <i>Resolution (R)</i>                                 | 6.78           |         | R > 0.8                                                |
| <i>Capacity factor (K)</i>                            | 2.85           | 5.08    | 1-10 acceptable                                        |
| <i>Selectivity factor (<math>\alpha</math>)</i>       | 1.78           |         | > 1                                                    |
| <i>Number of theoretical plates (N)</i>               | 2002.23        | 4916.46 | Increases with increasing the efficiency of separation |
| <i>Tailing factor (T)</i>                             | 1.79           | 1.93    | T ≤ 2<br>T= 1 for a typical symmetric peak             |
| <i>Height equivalent to one theoretical plate (H)</i> | 0.12           | 0.05    | The smaller the value, the higher the column efficacy  |

**Table 3S:** Validation parameters of the results obtained by applying the HPLC method for HYS and KTP determination.

| <i>Parameter</i>                             | <i>Value</i>  |               |
|----------------------------------------------|---------------|---------------|
|                                              | <b>HYS</b>    | <b>KTP</b>    |
| <b>●Linearity:</b>                           |               |               |
| Slope                                        | 3760.3        | 18983         |
| Intercept                                    | -11537        | 196793        |
| Correlation coefficient (r)                  | 0.9999        | 0.9998        |
| Range (µg/ml)                                | 10-200        | 50-1000       |
| <b>●Accuracy</b><br>( <i>Mean ± S.D</i> ):   | 99.63 ± 0.92  | 99.5 ± 1.4    |
| <b>●Precision (R.S.D%):</b>                  |               |               |
| Repeatability                                | 1.13          | 1.94          |
| Intermediate Precision                       | 1.29          | 1.98          |
| <b>●Specificity:</b><br>( <i>mean ± SD</i> ) | 100.33 ± 1.67 | 101.11 ± 0.73 |

**Table 4S:** System suitability parameters for the determination of DEX and BENZ by the HPLC method.

| Parameters                                            | Obtained value |         | Reference value                                        |
|-------------------------------------------------------|----------------|---------|--------------------------------------------------------|
|                                                       | DEX            | BENZ    |                                                        |
| <i>Resolution (R)</i>                                 | 11.88          |         | R > 0.8                                                |
| <i>Capacity factor (K)</i>                            | 1.89           | 4.25    | 1-10 acceptable                                        |
| <i>Selectivity factor (<math>\alpha</math>)</i>       | 2.25           |         | > 1                                                    |
| <i>Number of theoretical plates (N)</i>               | 4332.89        | 8613.83 | Increases with increasing the efficiency of separation |
| <i>Tailing factor (T)</i>                             | 1.38           | 1.20    | T ≤ 2<br>T= 1 for a typical symmetric peak             |
| <i>Height equivalent to one theoretical plate (H)</i> | 0.06           | 0.03    | The smaller the value, the higher the column efficacy  |

**Table 5S :** Validation parameters of the results obtained by applying the HPLC method for DEX and BENZ determination.

| <i>Parameter</i>                    | <i>Value</i>  |               |
|-------------------------------------|---------------|---------------|
|                                     | <b>DEX</b>    | <b>BENZ</b>   |
| <b>●Linearity:</b>                  |               |               |
| Slope                               | 17638         | 28580         |
| Intercept                           | -13938        | 30915         |
| Correlation coefficient (r)         | 0.9998        | 0.9998        |
| Range (µg/ml)                       | 5-100         | 5-100         |
| <b>●Accuracy</b><br>(Mean ± S.D):   | 100.73 ± 2.03 | 100.61 ± 1.61 |
| <b>●Precision (R.S.D%):</b>         |               |               |
| Repeatability                       | 2.43          | 1.70          |
| Intermediate Precision              | 2.05          | 1.69          |
| <b>●Specificity:</b><br>(mean ± SD) | 99.29 ± 1.20  | 99.82 ± 1.66  |
